# BayesTME: A unified statistical framework for spatial transcriptomics

Haoran Zhang<sup>1</sup>, Miranda V. Hunter<sup>2</sup>, Jacqueline Chou<sup>3</sup>, Jeffrey F. Quinn<sup>5</sup>,  
Mingyuan Zhou<sup>4</sup>, Richard White<sup>2</sup>, Wesley Tansey<sup>5\*</sup>

<sup>1</sup>Dept. of Computer Science, University of Texas at Austin

<sup>2</sup>Sloan Kettering Institute

<sup>3</sup>Dept. of Physiology, Biophysics, & Systems Biology, Weill Cornell Medical College

<sup>4</sup>McCombs School of Business, University of Texas at Austin

<sup>5</sup>Computational Oncology, Memorial Sloan Kettering Cancer Center

## Abstract

Spatial variation in cellular phenotypes underlies heterogeneity in immune recognition and response to therapy in cancer and many other diseases. Spatial transcriptomics (ST) holds the potential to quantify such variation, but existing analysis methods address only a small part of the analysis challenge, such as spot deconvolution or spatial differential expression. We present BayesTME, an end-to-end Bayesian method for analyzing spatial transcriptomics data. BayesTME unifies several previously distinct analysis goals under a single, holistic generative model. This unified approach enables BayesTME to (i) be entirely reference-free without any need for paired scRNA-seq, (ii) outperform a large suite of methods in quantitative benchmarks, and (iii) uncover a new type of ST signal: spatial differential expression within individual cell types. To achieve the latter, BayesTME models each phenotype as spatially adaptive and discovers statistically significant spatial patterns amongst coordinated subsets of genes within phenotypes, which we term spatial transcriptional programs. On human and zebrafish melanoma tissues, BayesTME identifies spatial transcriptional programs that capture fundamental biological phenomena like bilateral symmetry, differential expression between interior and surface tumor cells, and tumor-associated fibroblast and macrophage reprogramming. Our results demonstrate BayesTME's power in unlocking a new level of insight from spatial transcriptomics data and fostering a deeper understanding of the spatial architecture of the tumor microenvironment. BayesTME is open source and publicly available (<https://github.com/tansey-lab/bayestme>).

## Main

The tumor microenvironment (TME) is composed of a heterogeneous mixture of cell phenotypes, subtypes, and spatial structures. The composition of the TME impacts disease progression and therapeutic response. For instance, the composition of immune cells in the tumor microenvironment is a determinant of response to immunotherapy (IO)<sup>1</sup>. More recent work suggests that it is not cellular composition but rather the *spatial organization* of the microenvironment that determines IO response<sup>2,3,4,5</sup>. Spatially-unaware approaches, such as single-cell RNA and DNA sequencing (scRNA-seq and scDNA-seq), are able to capture the presence and abundance of different cell types and phenotypes (hereon referred to as simply types)<sup>6</sup>, but are unable to characterize their spatial organization. Spatial measurements and spatial modeling of the tumor microenvironment *in situ* present an opportunity to fully uncover and understand the role that spatial structure plays in determining disease progression and therapeutic response.

\*Corresponding email: [tanseyw@mskcc.org](mailto:tanseyw@mskcc.org)

33 Spatial transcriptomics (ST) technologies, such as Visium<sup>7</sup>, HDST<sup>8</sup>, and Slide-seq<sup>9</sup> enable biologists  
34 to measure spatially-resolved gene expression levels at thousands of spots in an individual tissue. Each  
35 tissue is divided into a grid or lattice of spots, with each spot in the grid typically 50–100 $\mu$ m wide, typically  
36 covering 10–60 cells. The tissue is permeabilized to release mRNAs to capturing probes with spot-specific  
37 barcodes. Bulk RNA-seq is then run on the captured mRNAs tagged with spatial barcodes. The result is a  
38 high-dimensional, spatially-localized gene expression count vector for each spot, representing an aggregate  
39 measurement of the gene expression of the cells in the spot.

40 Modeling spot-wise aggregate measurements is challenging as it requires disentangling at least four sources  
41 of spatial variation present in the raw signal. First, technical error, also known as spot bleeding, causes  
42 mRNAs to bleed to remote spots and contaminates the raw spatial signal. Second, variation in cell counts  
43 changes the absolute number of unique molecular identifiers (UMIs) per spot. Since UMI counts scale with  
44 the number of cells in each spot, conventional pre-processing methods like log-normalization break this linear  
45 relationship. Third, differences in the cell type proportions in each spot conflate signal strength with cell  
46 type prevalence. This complicates analysis as it necessitates performing a difficult deconvolution of each spot  
47 into its constituent cell type composition. These three sources of variation obscure the fourth, namely the  
48 spatial variation in gene expression within each cell type in response to the microenvironment. Teasing out  
49 these different sources of spatial variation in ST data is necessary to obtain a full understanding of the spatial  
50 architecture of the tumor microenvironment.

51 Several methods have been developed that specialize in a subset of these four sources of spatial variation.  
52 SpotClean<sup>10</sup> corrects spot bleeding by fitting an isotropic Gaussian model to raw UMI counts in order to  
53 map them back to their most likely original location. Spatial clustering methods<sup>11,12,13</sup> fuse spots together  
54 to effectively capture regions of constant cell type proportion with varying cell counts. Spot deconvolution  
55 methods<sup>14,15,16</sup> separate the aggregate signals into independent component signals with each attributable  
56 to a different cell type. Spatial differential expression methods<sup>17,18</sup> assess the aggregate spot signal to  
57 detect regions where individual genes or gene sets follow a spatial pattern. While each of these methods has  
58 moved the field of ST analysis forward, they each have shortcomings such as making incorrect parametric  
59 assumptions, requiring perfect reference scRNA-seq data, or only capturing aggregate signals rather than  
60 phenotype-specific ones.

61 Notably, existing methods assume cells of a given type have a static distribution of gene expression.  
62 This assumption is at conflict with the biological knowledge that cells change their behavior in response  
63 to their local microenvironment under mechanisms including proliferation, invasion, and drug resistance<sup>19</sup>.  
64 The microenvironment regulates cell behavior and therefore alters gene expression profiles of specific cell  
65 phenotypes<sup>20</sup>. These microenvironmental influences are particularly relevant in disease contexts. As an  
66 example, the microenvironment affects each phase of cancer progression and invasion-metastasis cascade<sup>21</sup>.  
67 Chronic inflammation is able to induce tumor initiation, malignant conversion, and invasion<sup>22</sup>. Recent  
68 research also shows cancer cells in the interior of a tumor behave differently than cancer cells at the interface  
69 with healthy cells<sup>23</sup>. Existing methods are unable to accurately capture spatial expression variation within  
70 cell types and thus modeling ST data to understand the spatial structure of transcriptomic diversity in each  
71 cell type remains an important open problem.

72 In this paper, we present BayesTME, a holistic Bayesian approach to end-to-end modeling of ST data  
73 that goes beyond existing techniques and captures spatial differential expression within cell types. BayesTME  
74 uses a single generative model to capture the multiscale and multifaceted spatial signals in ST data. At the  
75 highest level, BayesTME models the global pattern of spatial technical error present in raw ST data. As  
76 we demonstrate, ST data contain technical error that is anisotropic, with UMIs bleeding toward a specific  
77 direction in each sample. At the intermediate level, BayesTME places spatial fusion priors between spots,  
78 adaptively fusing tissue regions together to reveal cellular community structure. This also enables BayesTME  
79 to pool statistical strength across spots, enabling it to perform spot deconvolution without single-cell RNA-seq  
80 reference. Graph smoothing priors are simultaneously used to capture the spatial heterogeneity of within-  
81 phenotype gene expression. These priors enable BayesTME to discover spatial transcriptional programs  
82 (STPs), coordinated spatial gene expression patterns among groups of genes within a phenotype. Through an  
83 efficient empirical Bayes inference procedure, BayesTME infers all of the latent variables in the generative

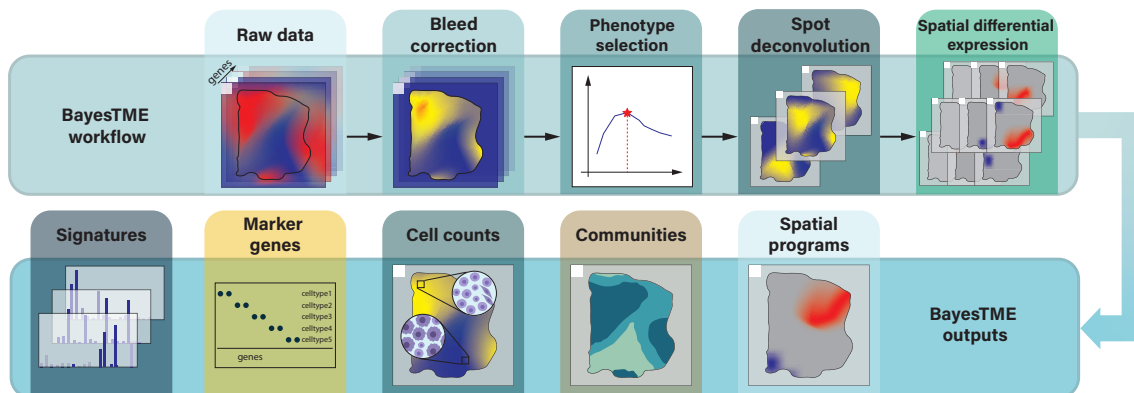

**Figure 1: The BayesTME computational workflow and outputs.** **Top:** BayesTME first corrects technical errors (spot bleeding) in the raw ST data by probabilistically mapping reads to their most likely original location in the tissue. An unbiased spatial cross-validation routine is then run to select the optimal number of distinct cell phenotypes. The cell phenotype count is then fixed and a reference-free spot deconvolution is run to simultaneously recover the cell phenotypes and their counts at each spot. Finally, the deconvolution model is augmented with a spatially-adaptive phenotype model to infer phenotype-specific spatial variations. **Bottom:** The final output of the complete BayesTME pipeline is the inferred cell phenotype expression signatures, the top marker genes that maximally distinguish phenotypes, the posterior distribution over the discrete cell counts of each type in each spot, the segmented tissue partitioned into cellular communities, and the spatial transcriptional programs discovered for each phenotype.

84 model with full quantification of uncertainty. Thus, BayesTME provides statistical control of the false  
85 discovery rate for marker genes, cell counts, expression profiles, and spatial transcriptional programs. Figure 1  
86 provides an overview of the BayesTME computational workflow (top) and outputs (bottom).

87 BayesTME outperforms existing methods on benchmarks for bleed correction, cell type identification,  
88 spot deconvolution, cellular community segmentation, and within-phenotype spatial gene expression. We  
89 demonstrate that existing methods based on aggregate spatial differentiation are unable to detect within-  
90 phenotype variation due to spatial variation in cell type proportions. In contrast, BayesTME identifies spatial  
91 transcriptional programs with high power while maintaining tight control over the false discovery rate on the  
92 reported spatially-varying genes in each cell type. On real tissues from human melanoma and a zebrafish  
93 melanoma model, BayesTME identifies spatial programs that capture core biological concepts like bilateral  
94 symmetry and differential expression between the surface and interior tumor cells. BayesTME is open source<sup>1</sup>,  
95 does not require reference scRNA-seq, and all hyperparameters are auto-tuned without the need for any  
96 manual user input.

## 97 Results

98 **A holistic generative model for spatial transcriptomics.** BayesTME models spatial variation at  
99 multiple scales in ST data using a single hierarchical probabilistic model. At the top-level, spot bleeding is  
100 modeled via a semi-parametric spatial contamination function. This bleeding model allows for any arbitrary  
101 spot bleeding process to be modeled, under the constraint that UMIs are less likely to bleed to spots that  
102 are farther away. By leveraging the non-tissue regions as negative controls (i.e. spots where the UMI count  
103 should be zero), BayesTME learns this function and then inverts it to estimate the true UMI counts for each  
104 in-tissue spot.

105 At the spot level, BayesTME models true UMI counts in each spot using a carefully specified negative  
106 binomial distribution. The spot convolution effects due to cell aggregation in each spot are captured in

<sup>1</sup><https://github.com/tansey-lab/bayestme>

107 the rate parameter. This ensures that a linear increase in the number of a particular cell type yields a  
108 linear increase in the UMIs from that cell type. The success probability parameter in the negative binomial  
109 likelihood is used to capture spatial variation *within each cell type*. These latter spatial parameters allow  
110 cell types to up- or down-regulate genes in each spot, enabling BayesTME to capture dynamic phenotypic  
111 behavior at spatially localized regions in the TME. This careful separation enables BayesTME to capture  
112 within phenotype spatial variation of gene expression, a more nuanced signal than currently recoverable by  
113 existing methods. Further, the uncertainty quantification provided by posterior inference enables BayesTME  
114 to detect significantly varying genes in each cell type with control of the false discovery rate.

115 Hierarchical priors in BayesTME encode heavy-tailed Bayesian variants<sup>24,25</sup> of the graph-fused group  
116 lasso prior<sup>26</sup> and the graph trend filtering prior<sup>27</sup>. The fused lasso prior enforces that the prior probability  
117 distribution over cell types follows a piecewise constant spatial function, encoding the biological knowledge  
118 that groups of cell phenotypes form spatially contiguous communities. The graph trend filtering prior allows  
119 gene expression to vary within cell types, encoding the biological knowledge that cells execute gene sets in a co-  
120 ordinated fashion, known as transcriptional programs. Spatial transcriptional programs extend this concept by  
121 identifying and quantifying the activation level of different programs in space. Identification of the BayesTME  
122 parameter values is achieved through a novel empirical Bayes inference algorithm that enables Bayesian  
123 quantification of uncertainty over each parameter of interest in the decontaminated data. See the Methods  
124 for the detailed hierarchical specification of the generative model and for details on parameter estimation.

### 125 **BayesTME accurately corrects previously-unreported directional spot bleeding in ST data.**

126 Plots of raw UMI counts in real ST data (Figure 2a-c) show the UMI signal bleeds to background spots with  
127 a gradient of intensity. These plots also suggest, unlike the Gaussian assumption in previous preprocessing  
128 methods<sup>10</sup>, or the uniform background noise model in other models<sup>16</sup>, bleeding error varies in magnitude in  
129 different directions. Such phenomena may be the result of cell-free DNA from dead cells, mRNA binding  
130 capacity limitation of spatial barcodes, or technical artifacts of tissue permeabilization.

131 BayesTME corrects bleeding while preserving the true signal. To do this, BayesTME learns a semi-  
132 parametric anisotropic bleeding model to correct directional ST bleed and map UMIs to their most likely  
133 origin in the tissue. The BayesTME correction only assumes that UMI bleeding decays monotonically as a  
134 function of distance. Non-tissue regions are leveraged by BayesTME as a form of negative control, enabling the  
135 method to identify the underlying spatial error function from the data via a maximum likelihood estimation  
136 procedure.

137 To evaluate the performance of the BayesTME bleed correction, we constructed synthetic datasets simu-  
138 lating three different bleeding mechanisms: Gaussian, heavy-tailed multivariate-t, and realistic (anisotropic)  
139 direction-biased bleeding (Figure 2e-g). The last simulation was constructed to resemble real ST data, with  
140 bias towards a specific corner of the slide. We compared BayesTME with SpotClean<sup>10</sup> (Figure 2d), an  
141 existing ST error correction technique that assumes Gaussian technical error. While both methods perform  
142 comparably in Gaussian ( $\mu_{MSE,SpotClean} = 1170.08$ ,  $\mu_{MSE,BayesTME} = 1263.66$ ,  $p$ -value = 0.06 ) and  
143 multivariate-t ( $\mu_{MSE,SpotClean} = 1210.06$ ,  $\mu_{MSE,BayesTME} = 1305.31$ ,  $p$ -value = 0.69 ) bleeding scenarios,  
144 BayesTME significantly outperformed SpotClean in the realistic bleeding scenario ( $\mu_{MSE,SpotClean} = 10437.48$ ,  
145  $\mu_{MSE,BayesTME} = 3048.92$ ,  $p$ -value =  $1.87 \times 10^{-301}$ ).

146 We found that cell typing and deconvolution were robust to this spatial error. However, bleed correction  
147 was critical to preventing genes from falsely registering as spatially varying in real ST data. These results  
148 suggest that ST experimental workflows should take care to allow ample non-tissue space in each direction of  
149 the slide. If the tissue section exceeds the fiducial markers substantially in a given direction, the technical  
150 error function will be statistically unidentifiable. In such cases, it will be impossible to distinguish technical  
151 error from true spatial variation, potentially leading to false conclusions when assessing spatially-varying  
152 gene expression within-phenotypes.

153 **BayesTME outperforms a suite of existing methods for phenotype inference, spot deconvolution, and tissue segmentation.** We benchmarked BayesTME against other methods: BayesSpace<sup>11</sup>,  
154 cell2location<sup>16</sup>, DestVI<sup>15</sup>, CARD<sup>29</sup>, RCTD<sup>30</sup>, STdeconvolve<sup>14</sup>, stLearn<sup>12</sup>, and Giotto<sup>13</sup> on simulated data  
155

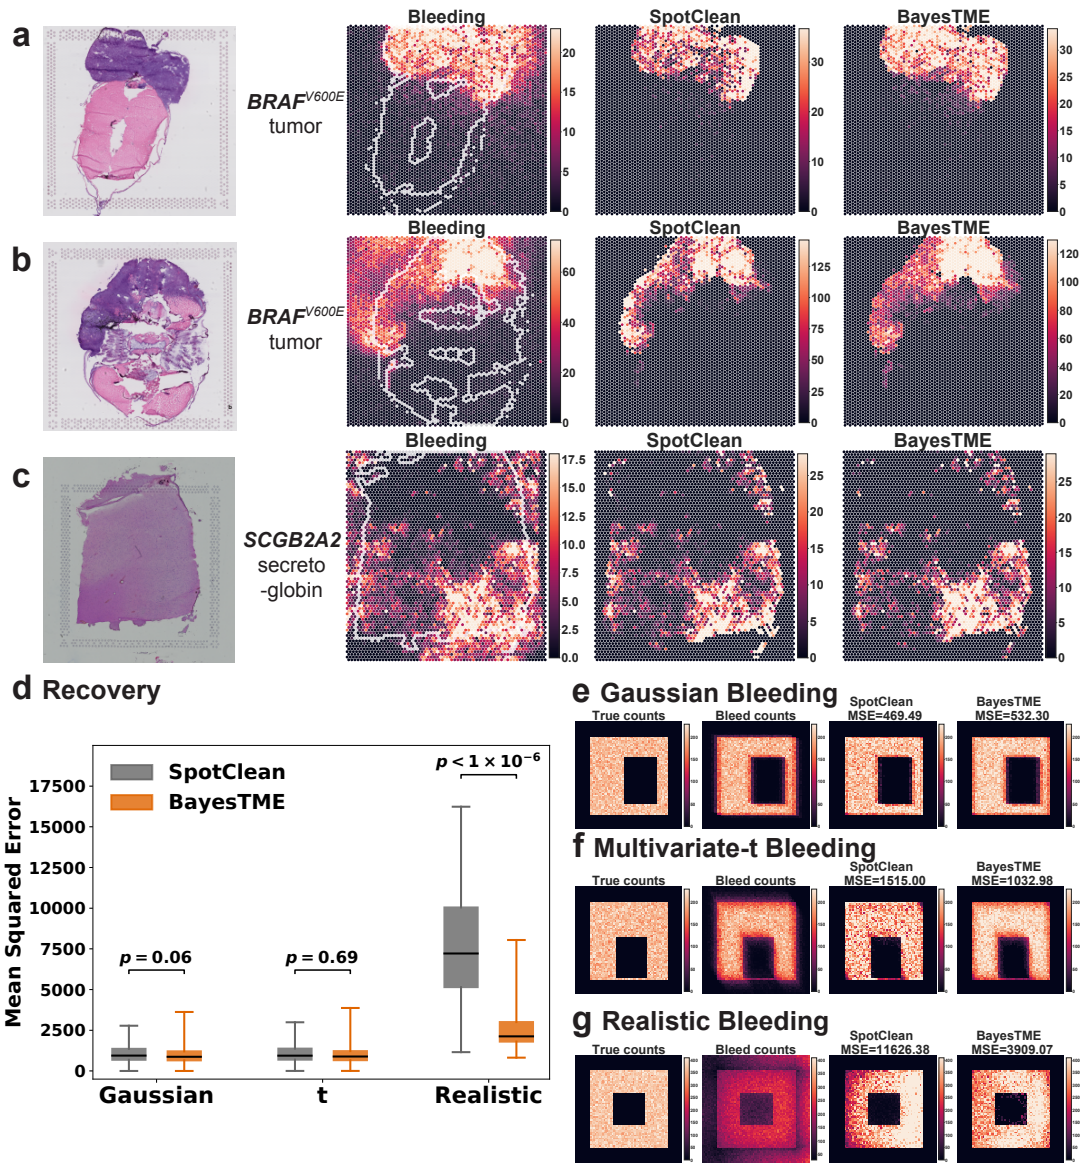

**Figure 2: BayesTME recovers UMI reads from bleeding contamination and preserves the spatial pattern of interest.** (a-c.) Bleed correction of selected marker genes in (a-b.) two zebrafish melanoma model samples and (c.) a human dorsolateral prefrontal cortex sample<sup>28</sup>, with comparison to SpotClean. Bleeding patterns consistently show directional, anisotropic skew towards one corner. SpotClean UMI corrections are therefore expected to be biased towards the tissue boundary whereas BayesTME is more diffuse and better recapitulates the true signal. (d.) BayesTME performs similarly to SpotClean when the bleeding pattern is isotropic and not skewed (e.g. Gaussian or Student's t); BayesTME substantially outperforms SpotClean when bleeding skews UMIs toward one direction as observed in real tissues. (e-g.) Examples of simulated bleeding patterns showing how BayesTME is able to learn and correct for the direction of the bleeding pattern.

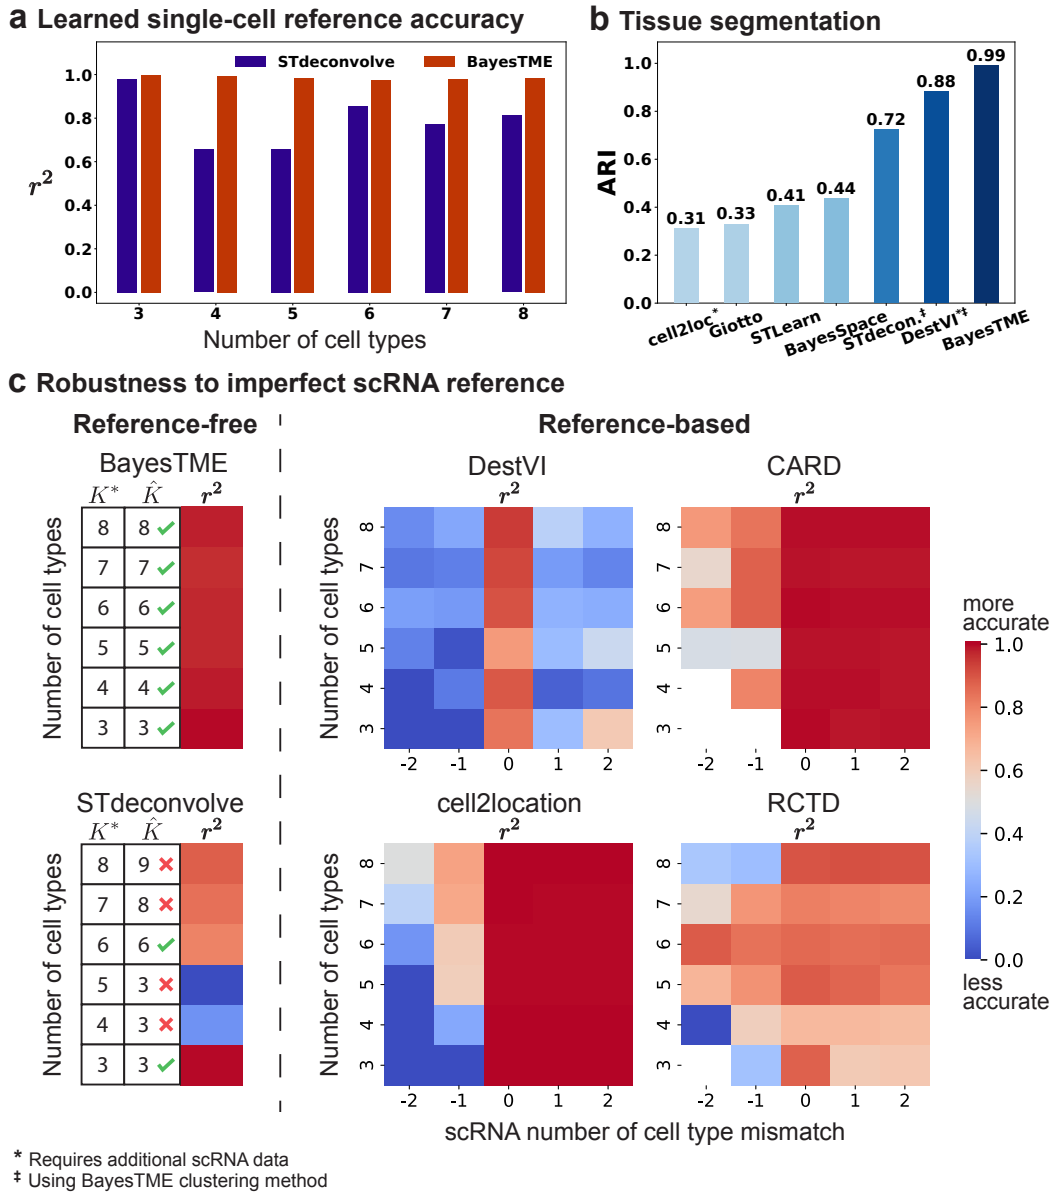

**Figure 3: BayesTME outperforms existing methods in semi-synthetic benchmarks. (a.)** BayesTME outperforms the reference-free method STdeconvolve in expression profile inference for each cell type, measured by the coefficient of determination ( $r^2$ ), for semi-synthetic data with ground truth number of cell types  $K^* = 3, 4, 5, 6, 7, 8$  (b.) BayesTME outperforms all other methods when segmenting the tissue into cellular communities, measured by adjusted Rand index (ARI). (c.) BayesTME outperforms existing methods in robustness benchmarks. Reference-based methods are vulnerable to imperfect scRNA reference as demonstrated by the decline in spot deconvolution accuracy; x-axis: reference contains a subset ( $< 0$ ), exact match ( $= 0$ ), or superset ( $> 0$ ) of the true reference. The existing reference-free method is not reliable in picking the correct number of cell types. BayesTME simultaneously detects the optimal number of cell types from the data and accurately deconvolves the spots.

156 based on real single-cell RNA sequencing (scRNA) data. We randomly sampled  $K^*$  cell types from a  
157 previously-clustered scRNA dataset<sup>16</sup>; we conducted experiments for  $K^*$  from 3 to 8. For a given  $K^*$ , we  
158 constructed spatial layouts consisting of 25 cellular communities, defined as spatially-contiguous regions  
159 of homogeneous mixtures of cell types. We randomly generated the total cell number for each spot with  
160 cellular-community-specific priors. After dividing the total cell number into  $K^*$  cell types, we randomly  
161 sampled cells from the scRNA data of the selected cell types and mapped them on top of the spot pattern  
162 from a human melanoma tissue sample<sup>31</sup>; see the Supplement for details. We compared the performance of  
163 BayesTME to the above existing methods on selecting the correct number of cell phenotypes, deconvolving  
164 spots, segmenting tissues into spatial communities, and detecting groups of spatially-varying genes within  
165 phenotypes. As we demonstrate, BayesTME outperformed existing methods across all benchmark tasks.

166 **BayesTME accurately identifies the correct number of cell phenotypes and each phenotype**  
167 **expression signature.** A core modeling task in ST analysis is deconvolution of the spots into their  
168 constituent cell phenotype proportions. Most existing methods require a scRNA-seq reference for deconvolution  
169 and cell type mapping. As has been noted<sup>16</sup>, these methods may be brittle when a cell type is missing  
170 from the reference. This vulnerability is particularly problematic in cancer where many subclones may  
171 exist and non-overlapping sets of subclones occur between different tissue samples. BayesTME learns the  
172 cell phenotypes—both the number of types and their signatures—directly from ST data without the need for  
173 scRNA-seq. Thus, BayesTME is robust to the natural spatial heterogeneity of phenotypes in cancer and other  
174 disease tissues. To evaluate the robustness and performance of BayesTME, we compared it to both an existing  
175 reference-free method and to existing reference-based methods with different degrees of scRNA missingness.  
176 To focus purely on the deconvolution and reference-free capabilities of BayesTME, our simulations did not  
177 apply any spot bleeding.

178 There are two tunable hyperparameters in BayesTME:  $K$ , the number of cell types, and  $\lambda$ , the global  
179 degree of smoothness. BayesTME uses a spatial cross-validation approach to automatically select both  
180 variables without the need for user input. The cross-validation procedure creates  $m$  non-overlapping folds each  
181 with  $\kappa\%$  of spots held out; we set  $m = 5$  and  $\kappa = 5\%$ . For each fold, BayesTME enumerates  $K = 2, \dots, K_{\max}$   
182 and  $\lambda = 10^1, \dots, 10^6$ ; in all of our experiments we set  $K_{\max} = 15$ . For each  $(K, \lambda)$ , we fit BayesTME on the  
183 in-sample data. Graph smoothing priors enable BayesTME to fill-in missing spots during cross-validation.  
184 BayesTME uses these imputed posterior estimates to evaluate the likelihood on the held out data. BayesTME  
185 integrates out  $\lambda$  in order to select  $K$  then chooses the  $\lambda$  value closest to the mean held out likelihood for the  
186 chosen  $K$ ; see the Methods for details.

187 We first evaluated how well the BayesTME recovers the true gene expression profiles of each cell type in  
188 each of our  $K^*$  (true number of cell types) settings. We compared the BayesTME result to STdeconvolve, a  
189 reference-free alternative method based on latent Dirichlet allocation<sup>32</sup> that provides three different approaches  
190 to estimating the number of cell types; we picked the closest estimation out of the three candidates that  
191 STdeconvolve provided. Reference-based methods assume access to ground truth cell type information from  
192 scRNA annotation, making them unavailable for comparison. In each simulation, BayesTME achieved a  
193 higher correlation with the true gene expression levels as measured by  $r^2$  (Figure 3a). Further, STdeconvolve  
194 over- or underestimated the true number of cell types whereas BayesTME selected the correct number of cell  
195 types in each setting (Figure 3c, left).

196 We next evaluated the robustness of reference-based methods DestVI, CARD, cell2location, and RCTD to  
197 reference mismatch. We found that while all methods performed well when the reference was perfectly matched,  
198 reference mismatch was problematic for all four reference-based methods (Figure 3c, right). Specifically,  
199 DestVI and RCTD were sensitive to the reference being a superset of the true number of cell types (x-axis  
200 values 1 and 2) and all four were sensitive to missing cell types (x-axis values -1 and -2). By not relying on  
201 any reference scRNA-seq, BayesTME retained high accuracy across all simulations (Figure 3c, left).

202 Finally, we evaluated the ability of different methods to segment the tissue into spatial regions representing  
203 cellular communities. In community detection benchmarks, BayesTME (adjusted Rand index<sup>33</sup>,  $ARI = 0.99$ )  
204 surpassed all other currently available alternatives (Figure 3 b), including both spatial clustering (BayesSpace,  
205 STLearn, Giotto) and spot deconvolution (cell2location, DestVI, STdeconvolve) methods. For cell2location

206 ( $ARI = 0.31$ ) we used its built-in Leiden clustering; when inserting the BayesTME spatial clustering,  
207 cell2location improved to  $ARI = 0.93$ , suggesting the BayesTME clustering provides an independent benefit  
208 even for accurate deconvolution methods.

209 **BayesTME identifies within-phenotype spatial transcriptional programs with tight control of**  
210 **the false discovery rate.** In addition to bleed correction, deconvolution, and cell typing, BayesTME  
211 detects gene expression levels of each phenotype that vary in space. To do this, the generative model for  
212 BayesTME uses a negative binomial likelihood where spatially-invariant expression levels parameterize the rate  
213 and spatially-dependent expression levels parameterize the success rate. Hierarchical spatial shrinkage and  
214 clustering priors on the success rate parameters enable BayesTME to discover genes within each phenotype  
215 that spatially vary in coordination with other genes. We call these gene sets and spatial patterns *spatial*  
216 *transcriptional programs* (STPs). The STP construction in BayesTME is flexible: it allows for genes to be  
217 negatively spatially correlated within the same program, makes no assumption on the shape or pattern of  
218 spatial variation, and adaptively discovers how many genes are in each program. After inference, we use the  
219 posterior uncertainty to select STPs with control of the Bayesian false discovery rate (see Methods); we set  
220 the FDR target to 5% by default.

221 To benchmark BayesTME, we constructed a simulation dataset with spatial transcriptional programs by  
222 randomly sampling cells from the scRNA data following the same fashion as in the previous experiments.  
223 We used the spatial layout from a zebrafish melanoma sample as it is a large tissue containing more than  
224 2000 spots, enabling a rich set of spatial patterns to be imprinted. We chose  $K^* = 3$  cell types and designed  
225 2 spatial programs for each cell type, where 10 genes were randomly sampled and assigned to each of the  
226 STPs (Figure 4c). After selecting these 60 spatial genes, we reordered their sampled reads by the spot  
227 intensity of their respective spatial programs to simulate the spatial differentiation while preserving the mean  
228 expression. Thus, while the gene expression patterns are spatially informative in these simulations, clustering  
229 by scRNA-seq analysis would remain unchanged.

230 We benchmarked BayesTME against spatial differential expression methods<sup>18,17</sup> that enable control of  
231 the false discovery rate. BayesTME identified all 6 spatial transcriptional programs with on average 0.88  
232 Pearson's  $r$  correlation to the ground truth (Figure 4a,c). In contrast, we found SpatialDE and Spark could  
233 only detect phenotype proportion patterns instead of meaningful within-phenotype variation in spatial gene  
234 expression (Figure 4d-e). We also evaluated the DestVI spatial expression detection mechanism and found  
235 the results to be uncorrelated with the ground truth (see Supplement for details). Quantitatively, BayesTME  
236 achieved an average false discovery proportion of 14% where the 95% confidence interval covers the 5% target  
237 FDR, and TPR of 94% for selecting spatially varying genes (Figure 4b).

238 **BayesTME discovers novel spatial programs of immune infiltration and response in human**  
239 **melanoma.** We applied BayesTME to a published human melanoma dataset<sup>31</sup> generated using first  
240 generation ST technology, with a spot diameter of 100  $\mu m$  and center-to-center distance between spots of  
241 200  $\mu m$ <sup>34</sup>. The selected sample contained visible tumor, stromal, and lymphoid tissues as annotated by a  
242 pathologist based on H&E staining (Figure 5a). Despite the relatively low resolution of the data, the cell  
243 types identified by BayesTME successfully recapitulated the histology of the tissue (Figure 5b).

244 Five spatial transcriptional programs were identified by BayesTME (Figure 5c). Two programs were  
245 tumor-specific, and displayed somewhat distinct expression patterns, suggesting a spatially-segregated pattern  
246 of tumor heterogeneity (Figure 5c). As expected, melanoma marker genes such as *PMEL* and *SOX10* were  
247 highly upregulated within the tumor programs (Figure 5d). Similar to the pathologist annotations, the  
248 model also detected spatial programs corresponding to stromal (fibroblast) and lymphoid tissues (Figure 5c),  
249 which marker genes including *COL1A1* (fibroblast-specific, Figure 5c-d) and *CXCL13* (lymphoid-specific,  
250 Figure 5d). Notably, *MYL9* was one of the most highly expressed genes within the fibroblast expression  
251 signature (Figure 5d), which is a marker of tumor-associated myofibroblasts<sup>35</sup>, indicating that the fibroblast  
252 program identified by BayesTME represents a subpopulation of fibroblasts reprogrammed by their proximity  
253 to the tumor. In the fibroblast-related spatial program, immune-related hub genes like *IGLL5* and *IGJ*  
254 displayed an enrichment at the tumor boundary (Figure 5c). The model also identified a macrophage-related



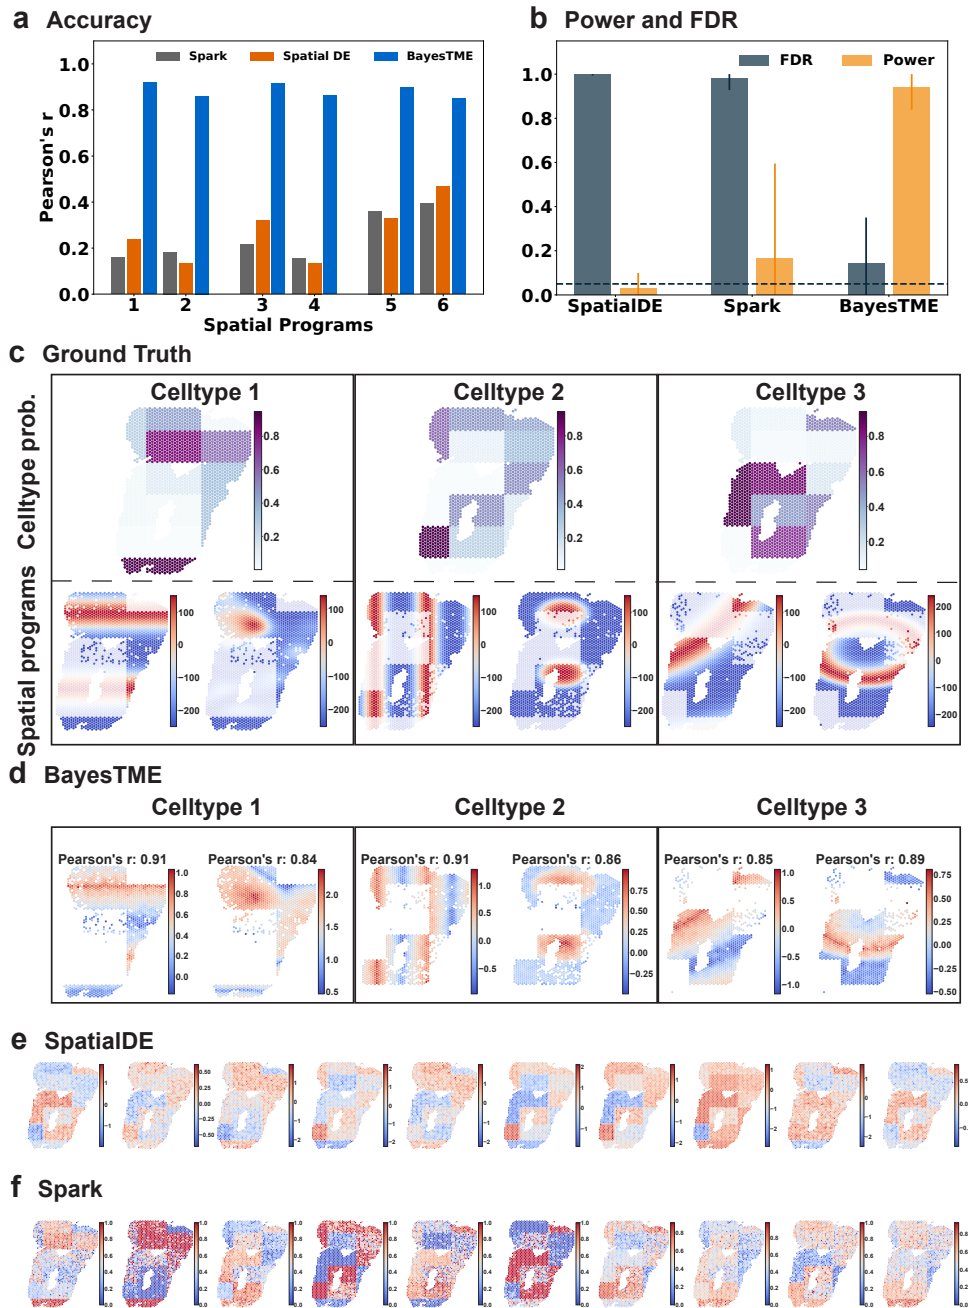

**Figure 4: BayesTME discovers spatial transcriptional programs with high power and tight control of the false discovery rate (a.)** Accuracy of the closest spatial pattern discovered by each method to the ground truth. **(b.)** True positive rate (orange) and false discovery rate (gray) for each method when predicting which genes belong to each spatially varying pattern; the dashed line is the target (5%) false discovery rate. **(c.)** Ground truth spatial patterns used in the benchmark simulations; top: cell type proportion probabilities; bottom: spatial pattern followed by the genes in each spatial program. **(d.)** Spatial programs found by BayesTME at the 5% FDR level. **(e-f.)** Spatial patterns found by other methods; both SpatialDE and Spark are unable to disentangle phenotype proportions from spatial gene expression within phenotypes.

255 spatial program (Figure 5c), which had not been detected by the pathologist. One of the top macrophage  
256 marker genes, *CXCL9* (Figure 5c-d) is a marker of tumor-associated macrophages<sup>36</sup>, which have an important  
257 role in anti-tumor immunity<sup>37</sup>. Taken together, our results show that BayesTME can successfully not only  
258 recapitulate, but also improve the detection of novel tumor and tumor-associated cell types that are difficult  
259 to identify purely by histology.

260 **BayesTME discovers spatial programs capturing muscular bilateral symmetry and tumor-**  
261 **immune interaction in a zebrafish melanoma model.** We expanded upon our human melanoma  
262 results by applying BayesTME to our recently published dataset of zebrafish *BRAF*<sup>V600E</sup>-driven melanoma<sup>23</sup>,  
263 generated using the 10X Genomics Visium technology with approximate spot resolution of 55  $\mu$ m. Both  
264 samples contained tumor and TME tissues (muscle, skin) (Figure 6, Figure 7).

265 Within Sample A, BayesTME identified cell types corresponding to tumor, skin, and muscle (Figure 6b-c).  
266 Each cell type upregulated expected marker genes, such as myosins and parvalbumins in muscle (*myhc4*, *myl10*,  
267 *pvalb1*, *pvalb2*, *pvalb3*, *pvalb4*), *BRAF*<sup>V600E</sup> in tumor, and keratins in skin (*krt5*, *krt91*, *krt15*) (Figure 6c).  
268 Two celltypes (“Tumor” and “Interface”) were detected within the tumor, both expressing *BRAF*<sup>V600E</sup>  
269 (Figure 6a-c). Although the tumor region of Sample A bordered adjacent muscle with little mixing of the  
270 two tissue types visible on the H&E-stained section, the interface cell type appeared to infiltrate into the  
271 neighboring TME, reminiscent of the interface cell we identified in our recent work<sup>23</sup> (Figure 6a). Many  
272 of the interface marker genes were the same as interface marker genes we previously identified, including  
273 *stmn1a*, *tubb2b*, and *hmg1a*<sup>23</sup> (Figure 6c). Both spatial programs corresponding to the interface type  
274 were enriched at the tumor boundary (Figure 6d). In addition to the interface marker genes we previously  
275 identified, BayesTME uncovered a number of genes related to remodeling of the extracellular matrix (ECM)  
276 that displayed a spatial enrichment at the tumor boundary, including several collagen-related genes (*coll1a1a*,  
277 *coll1a2*, *coll1a1b*; Figure 6d), consistent with a role for the interface cell state in melanoma invasion. Immune  
278 genes were also enriched at the tumor-muscle interface, including *ilf2* and *grn1* (Figure 6c-d).

279 Sample B contains a wider variety of tissue types including heart, brain, gills, tumor, and muscle (Figure 7a-  
280 c). Mixing of tumor and muscle tissues at the tumor boundary was visible by histology (Figure 7a). Notably,  
281 BayesTME again uncovered an “interface” cell state specifically enriched at the tumor boundary (Figure 7a-b).  
282 Similar to Sample A, a number of immune-related genes were spatially patterned and/or enriched in the  
283 interface region, including *lygl1*, *grn1*, *cd74a/b*, and *b2m* (Figure 7c-d). Melanoma is a highly immunogenic  
284 cancer whose interaction with immune cells in the TME significantly influences tumor progression<sup>38</sup>. Whether  
285 the enrichment of immune genes at the tumor-TME interface represents pro-inflammatory tumor cells at the  
286 tumor boundary, or a type of novel tumor-associated immune cell type will be an exciting topic of future  
287 investigation.

288 In both samples, we uncovered a significant degree of spatially-patterned tumor heterogeneity. BayesTME  
289 identified spatial programs characterized by up-regulation of classical melanoma markers such as *pmela* and  
290 *tyrp1b* (Sample A “Tumor”, Figure 6d) and *BRAF*<sup>V600E</sup> and *sox10* (Sample B “Tumor 3”, Figure 7d). Other  
291 spatial programs identified in the tumor likely represent other facets of tumor biology. Hypoxia-related  
292 genes (*hif1an*, *egln3*; Figure 6d) were spatially enriched within the tumor region of Sample A, which may  
293 indicate hypoxic regions of the tumor due to lack of oxygen supply. Hypoxia has been linked to melanoma  
294 progression<sup>39</sup>. We also identified spatially-patterned signatures of metabolism, which could represent different  
295 metabolic pathways active within the tumor. One of the spatial programs identified within the tumor region  
296 of Sample B up-regulated several genes corresponding to ATP synthase subunits (*atp5a1*, *atp5e*, *atp5b*)  
297 and other metabolic genes (*gpi1a*, *tpi1b*) (Figure 7d). Determining how different metabolic pathways are  
298 spatially-organized and regulated within the tumor will be an interesting area of further study. Taken together,  
299 our results indicate that BayesTME identifies complex spatial patterns of transcriptional heterogeneity within  
300 melanoma and the melanoma microenvironment, and uncovers a potentially novel pro-inflammatory cell state  
301 present at the tumor boundary.

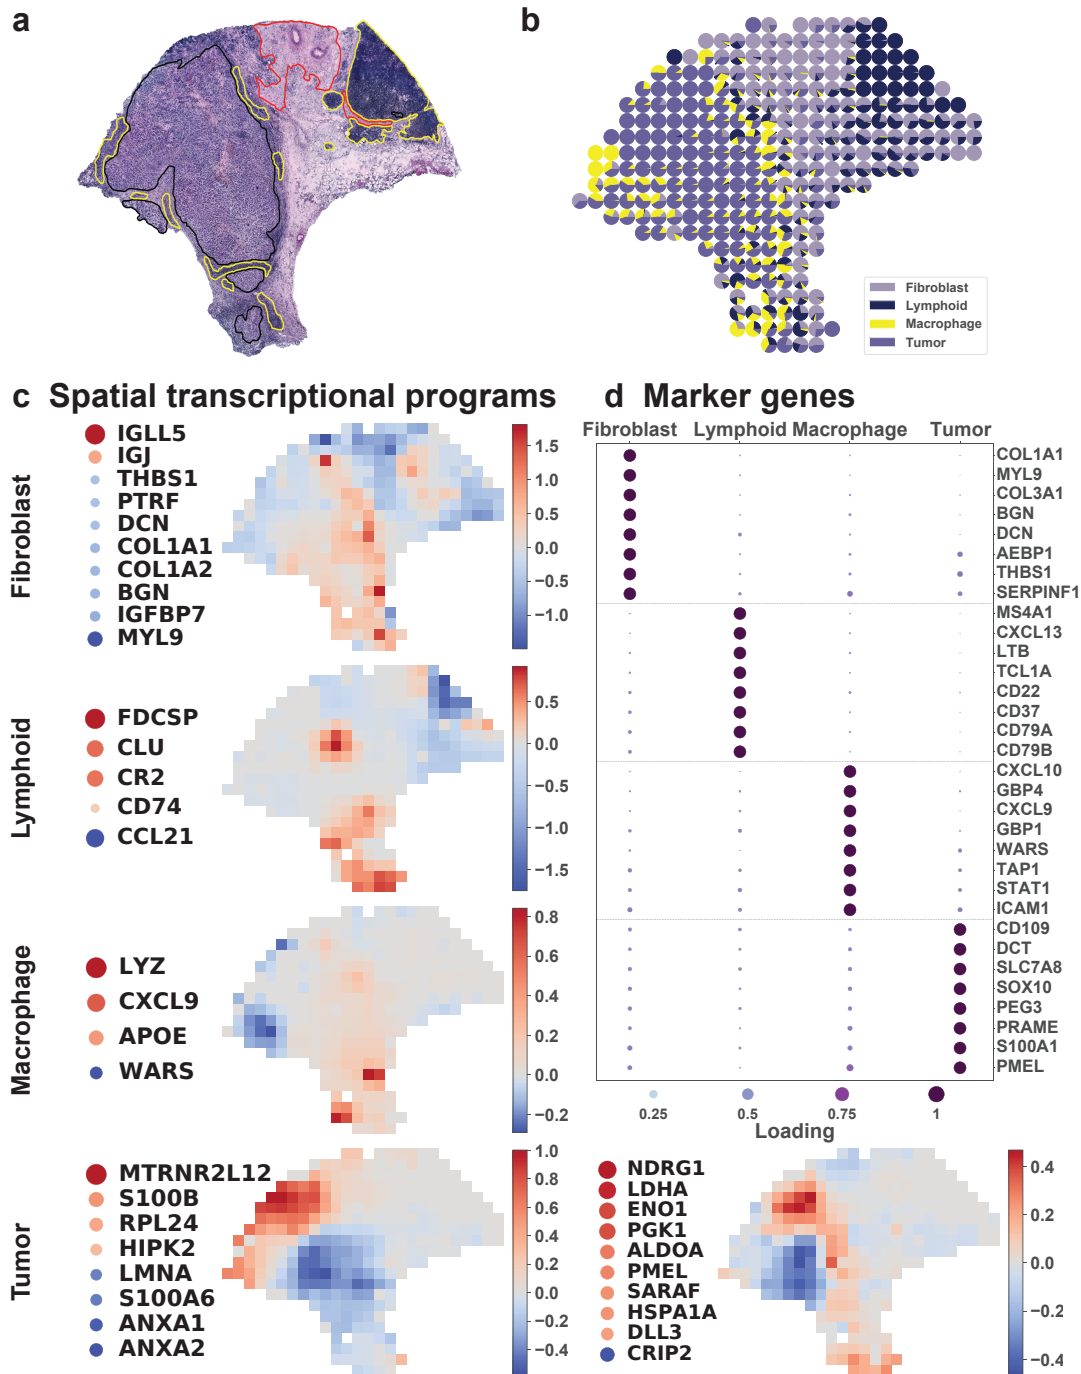

**Figure 5: BayesTME discovers novel spatial programs of immune-tumor interaction in human melanoma.** (a.) Pathologist-annotated H&E slide; yellow: immune cells, red: stroma, black: tumor. (b.) BayesTME recovers 4 cell types which map closely to the pathologist annotations. (c.) BayesTME recovers 5 spatial programs representing fibroblasts, immune cells, and two programs covering tumor subtypes related to transcription (left) and stress responses (right). (d.) Top marker genes selected by BayesTME to describe each cell type.

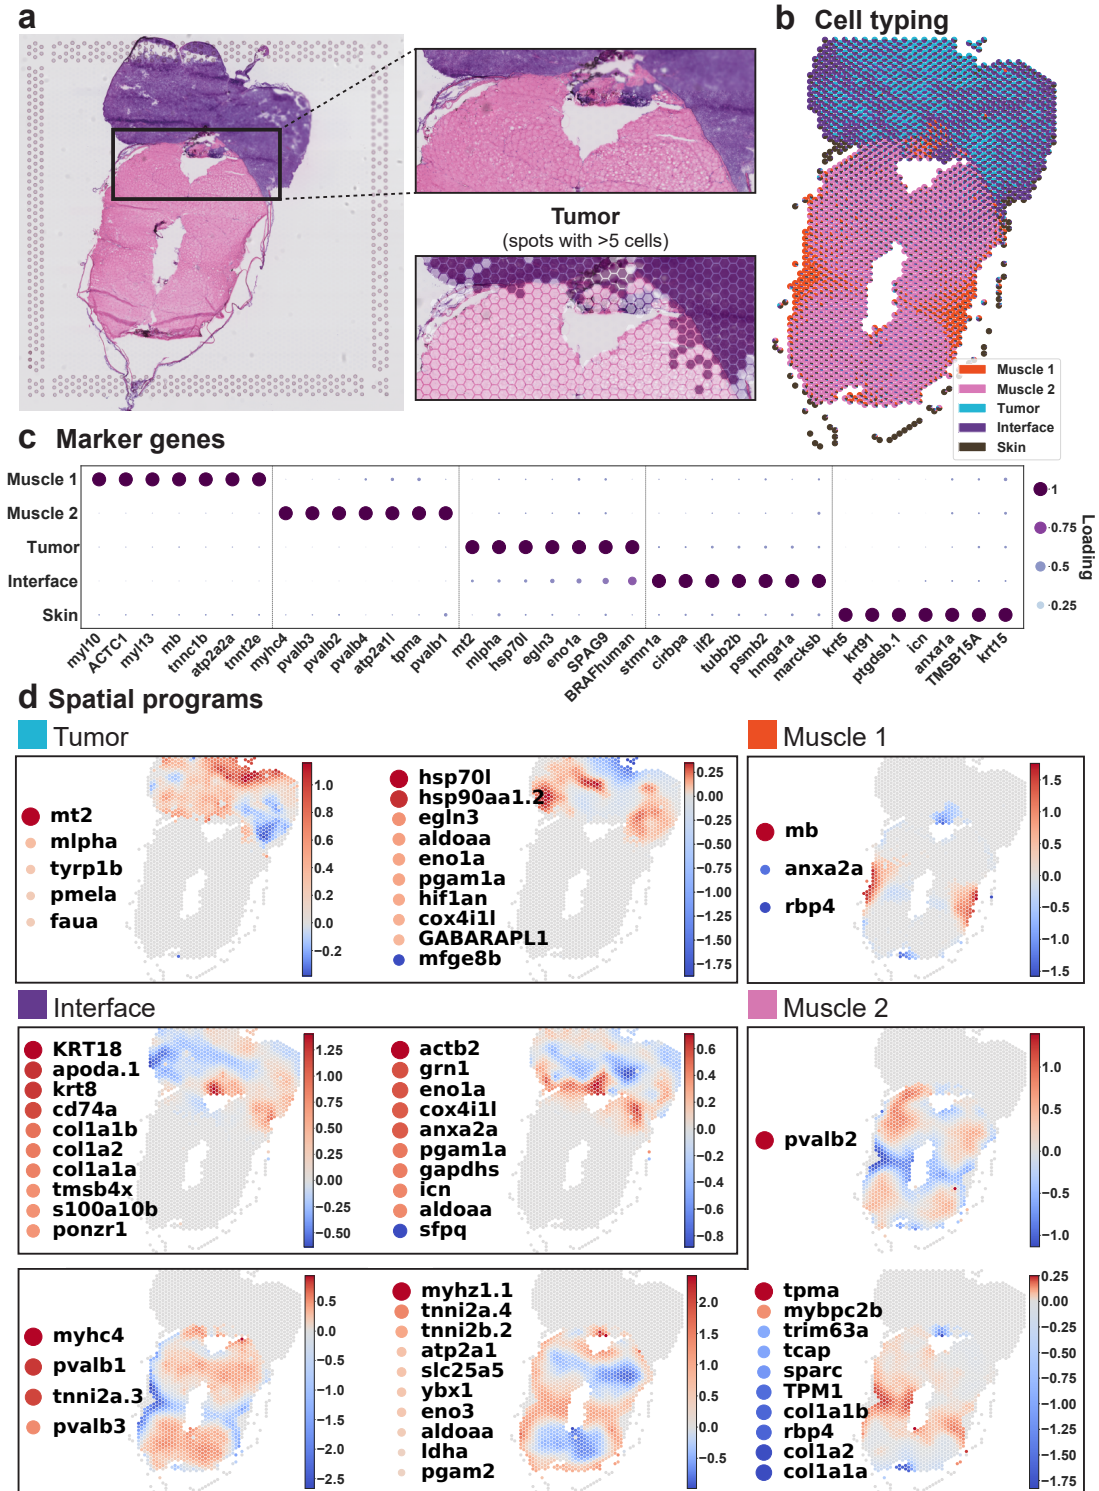

**Figure 6: BayesTME identifies sharp boundaries and novel tumor interface programs in a zebrafish melanoma model.** (a.) Histology of zebrafish sample A; cutout: zoom in on the tumor interface region. (b-c.) BayesTME discovers 5 cell phenotypes with biologically plausible marker genes; cutout: zoom in on the recovered tumor/not-tumor proportions show BayesTME captures the sharp tissue change point. (d.) 9 spatial transcriptional programs discovered at a 5% FDR; muscle programs illustrate BayesTME captures bilateral symmetry without prior knowledge; interface and tumor programs capture differences between interior and exterior tumor behavior.

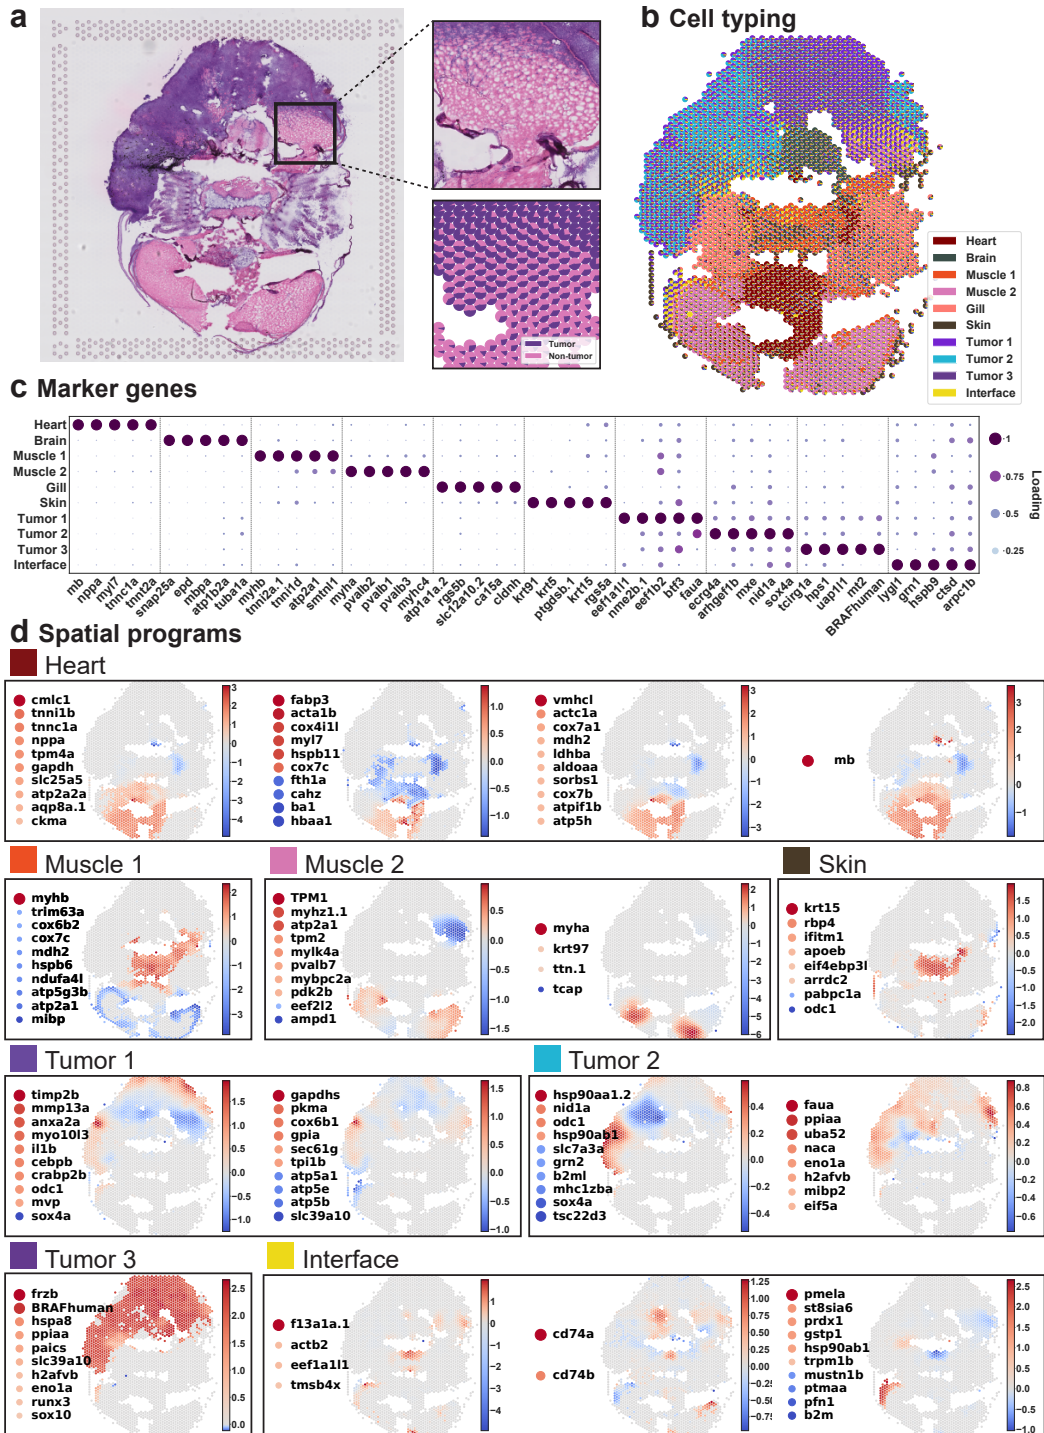

**Figure 7: BayesTME reveals gradual tumor invasion and confirms interface programs in a second zebrafish melanoma model (a).** Histology of the zebrafish B sample; cutout: tumor interface with gradual invasion of tumor cells into the muscle region. **(b).** BayesTME cell types recovered; cutout: corresponding tumor-muscle interface with tumor/non-tumor proportions capturing the gradient of tumor invasion present in histology. **(c.)** Marker genes for the discovered 10 cell types. **(d.)** 16 spatial transcriptional programs discovered at a 5% FDR.

## 302 Discussion

303 This paper has presented BayesTME, a reference-free Bayesian method for end-to-end analysis of spatial  
304 transcriptomics data. Compared with existing scRNA-seq referenced methods, BayesTME applies to a wider  
305 variety of tissues for which scRNA-seq may not be tractable due to economic, technical, or biological limitations.  
306 Even when references are available, highly heterogeneous and diseased tissues may contain different subsets of  
307 cell types between consecutive samples. However, BayesTME is adaptable to scRNA-seq reference if a reliable  
308 one is available. With reference data, one can obtain the empirical estimation of the expression signature  $\phi$ ,  
309 which is invariant to sequencing depth batch effects. Computationally, access to pre-clustered scRNA-seq  
310 significantly accelerates the inference by removing the need to perform cross-validation to select the cell  
311 phenotypes. On the other hand, unlike most reference-free methods, BayesTME does not rely on dimension  
312 reduction like PCA. This advantage enables BayesTME to draw individual gene-level inferences including  
313 expression signatures, phenotype markers, and spatial transcriptional programs which current methods miss.  
314 Our comparison to 11 other ST data analysis methods highlighted BayesTME's advance in bleed correction,  
315 spot deconvolution, tissue segmentation, and within-cell-type spatial variation in gene expression.

316 Advances in ST technology promise to soon enhance the resolution to near-single cell levels, dramatically  
317 increasing the number of spots. We have carefully designed the computational inference routines in BayesTME  
318 to meet this challenge. BayesTME scales sub-linearly with the number of spots, with a 100x increase in the  
319 number of spots leading to only a 10x increase in computational runtime (Supplementary Fig. 9). To further  
320 speed up inference, one can place an informative prior on the cell count in a given spot using the H&E slide  
321 as reference; simulation experiments show that with a handful of noisy cell count annotations, the cell count  
322 accuracy also improves to nearly perfect (see the Supplement for details).

323 Understanding how cells alter their expression levels as a function of their spatial location in a tissue  
324 is necessary for a complete characterization of the cellular architecture of the tissue microenvironment.  
325 BayesTME captures these expression level changes in the form of spatial transcriptional programs. Our  
326 results showed BayesTME is able to capture biologically meaningful spatial programs which hint at cell-cell  
327 interaction in tumor microenvironments. To further facilitate our understanding of cell-cell interaction  
328 mechanisms, future versions of BayesTME will introduce an additional cell-type interaction term in the  
329 success rate formulation in our negative binomial model. This interaction term will model the total influence  
330 cell type  $k$  in spot  $i$  as the sum of the interactions between cell type  $k$  and all possible cell types  $k'$ . We also  
331 plan to explore extending this formulation to all spots within a reasonable neighboring of spot  $i$  for global  
332 interactions triggered by paracrine, synaptic, or endocrine signaling. This process is computationally expensive  
333 under the current ST technology. However, with single-cell resolution, such inference becomes tractable as we  
334 only need to look at the individual cells of different cell types within the reasonable neighborhood of cell  
335  $i$ . Increased ST resolution will significantly drop the computation cost by a factor of  $K$ , which can also be  
336 vectorized to further speed up this process. Thus, BayesTME is well-positioned to make future computational  
337 advances in ST modeling, in step with the coming technological advances in ST methods.

## 338 Methods

### 339 Notation and setup

340 We assume we are given an  $N \times G$  matrix  $R$  where  $R_{ig}$  is the UMI counts for gene  $g$  at spot  $i$ . The spot  $i$   
 341 is associated with some known location  $l(i) \in \mathbb{R}^2$  on the tissue. These locations define a graph  $\mathcal{G} = (\mathcal{V}, \mathcal{E})$   
 342 where each vertex is a spot. There is an edge between two vertices if they are within some  $\epsilon$  distance. We set  
 343  $\epsilon = \sqrt{2}$  such that each non-boundary spot has 4 neighbors for lattice layouts (e.g., Slide-seq) and 6 neighbors  
 344 for hexagonal layouts (e.g., Visium). We assume that there are  $K$  cell phenotypes (hereon simply called cell  
 345 types) in the sample, each with their own expression profile. We do not assume that  $K$  is known nor do we  
 346 assume that there is side information about different cell types and their expression profiles (i.e., we do not  
 347 assume access to paired single-cell RNA). We refer to UMI counts and read counts interchangeably, where  
 348 read counts are understood to mean UMI-filtered reads and not raw, possibly-duplicated reads.

### 349 Generative model

350 BayesTME models several sources of spatial variation in ST data using a single hierarchical probabilistic  
 351 model,

|                                                       |                                                                                                     |
|-------------------------------------------------------|-----------------------------------------------------------------------------------------------------|
| (Raw, corrupted reads in spot $i$ for gene $g$ )      | $\tilde{\mathbf{R}}_g \sim \xi(\mathbf{R}_g)$                                                       |
| (Reads in spot $i$ for gene $g$ )                     | $R_{ig} = \sum_{k=1}^K R_{igk}$                                                                     |
| (Reads specific to cell type $k$ )                    | $R_{igk} \sim \text{NegBinom}(\beta_k d_{ik} \phi_{kg}, \sigma(w_{ki}^{(h_{kg})} v_{kg} + c_{kg}))$ |
| (Expression signature for cell type $k$ )             | $\phi_k \sim \text{Dir}(\boldsymbol{\alpha})$                                                       |
| (mRNA content for cell type $k$ )                     | $\beta_k \sim \text{Gamma}(a, b)$                                                                   |
| (Total # cells in spot $i$ out of $n_{max}$ possible) | $D_i \sim \text{Binom}(n_{max}, 1 - \sigma(\psi_{i0}))$                                             |
| (# cells of type $k$ in spot $i$ )                    | $d_{ik} \sim \text{Binom}(n_{k-1}, \sigma(\psi_{ik})), \quad \forall 1 < k < K$                     |
| (Diff in cell type dist between neighbors)            | $(\Delta\Psi)_j \sim \text{GroupHorseshoe}(\lambda)$                                                |
| (Spatial transcriptional program membership)          | $h_{kg} \sim \text{Cat}(\theta_k)$                                                                  |
| (STP membership prior odds for cell type $k$ )        | $\theta_k \sim \text{Dir}(10, 1, 1, \dots, 1)$                                                      |
| (Spatially-invariant dispersion factor)               | $c_{kg} \sim \mathcal{N}(0, 1)$                                                                     |
| (STP loading for gene $g$ in cell type $k$ )          | $v_{kg} \sim \text{Horseshoe}+$                                                                     |
| (Null STP program)                                    | $w_k^{(0)} = \mathbf{0}$                                                                            |
| (Spatial pattern of STP $h$ for cell type $k$ )       | $(\Delta^{(1)} w_k^{(h>0)})_j \sim \text{Horseshoe}+,$                                              |

(1)

352 where  $\sigma$  is the logistic function,  $D_i$  is the total number of cells in spot  $i$ , and  $\lambda$  is the hyperparameter that  
 353 controls the degree of spatial smoothing. The function  $\xi(\cdot)$  is a nonparametric function defining the spot  
 354 bleeding process that probabilistically maps from the true read counts  $\mathbf{R}_g$  for each gene  $g$  to the observed  
 355 counts  $\tilde{\mathbf{R}}_g$ . We specify no functional form for this function and only constrain it to be decreasing in the  
 356 distance from the true to observed spot location. The matrix  $\Delta$  is the edge-oriented adjacency matrix  
 357 encoding the spot graph  $\mathcal{G}$ , also equivalent to the root of the graph Laplacian;  $\Delta^{(1)} = \Delta^T \Delta$  is the first-order  
 358 graph trend filtering matrix<sup>40,41</sup>, equivalent to the graph Laplacian.

359 Since full Bayesian inference in the above model is computationally intractable, we develop an efficient  
 360 empirical Bayes approach that splits posterior inference into stages. This piecewise approach to fitting is  
 361 distinguished from the ad hoc pipeline approach of existing workflows in that a single, coherent generative  
 362 model is driving the estimation. The empirical Bayes approach merely plugs in point estimates for nuisance  
 363 parameters while providing full Bayesian inference with uncertainty quantification for the latent variables of  
 364 interest.

### 365 Gene selection

366 BayesTME scales linearly with the size of the gene library. To keep posterior inference computationally  
 367 tractable, we select the top  $G = 2000$  genes ordered by spatial variation in log space. Specifically, we transform

368 the reads as  $\log(1 + R)$  and rank each column by the variance, keeping the top 2000. The logarithmic transform  
 369 separates spatial variation from natural variation that arises due to simply having a higher overall expression  
 370 rate. We then drop all ribosomal genes (i.e., those matching an ‘rp’ regular expression). After selecting and  
 371 filtering the top genes, we work directly with the UMI read counts.

### 372 Anisotropic bleed correction

373 Technical error causes UMIs to bleed out from barcoded spots. BayesTME models this bleed as a combination  
 374 of unknown global and local effects. Global effects form a baseline bleed count for any spot, corresponding to  
 375 a homogeneous diffusion process. Local effects imply that the UMI count at a given spot is a function of how  
 376 far it is from the original location of each of the UMIs. BayesTME employs a semi-parametric, anisotropic  
 377 model for global and local effects,

$$\begin{aligned} \tilde{\mathbf{R}}_g &\sim \text{Mult} \left( \sum_i \tilde{R}_{ig}, \boldsymbol{\rho}_g / \sum_i \rho_{ig} \right) \\ \rho_{ig} &= \rho_{0g} + \sum_{i'} w_{ii'} \mu_{i'g} \\ w_{ii'} &= \sum_{b=1}^B \sum_{j=0}^{s_b(i,i')} \log(1 + e^{\zeta^{bj}}), \end{aligned} \quad (2)$$

378 where  $\tilde{\mathbf{R}}_g$  are the raw, observed counts and  $\rho_{0g}$  are the global effects. The local effects in Equation (2)  
 379 are modeled using a set of  $B$  monotone nonparametric basis functions  $\zeta$  that decay as a function of the  
 380 basis-specific pseudo-distance  $s_b$ .<sup>2</sup> BayesTME uses the four cardinal directions (North, South, East, and  
 381 West) for the basis functions. This choice is based on the observation that UMIs tend to bleed toward one  
 382 corner. We also observed that bleeding appears to be less extreme in tissue regions than non-tissue regions.  
 383 Thus, BayesTME distinguishes between in- and out-of-tissue distance by learning four separate basis functions  
 384 for each region. The distance from an original spot  $i'$  to its observed spot  $i$  is then a summation of the in-  
 385 and out-of-tissue components of a straight line between the two spots.

386 The bleeding model is fit by alternating minimization. At each iteration, BayesTME alternates between  
 387 estimating the basis functions  $\hat{\zeta}$  and global rates  $\hat{\rho}_{0g}$ , and estimating the latent true UMI rates  $\hat{\mu}_{ig}$ . After the  
 388 model is fit, BayesTME replaces the raw reads with the approximate maximum likelihood estimate of read  
 389 counts,

$$R_g = \arg \max \text{Mult} \left( R_g; \sum_i \tilde{R}_{ig}, \hat{\boldsymbol{\rho}}_g / \sum_i \hat{\rho}_{ig} \right) \approx \text{round} \left( \tilde{R}_{ig} \times \hat{\boldsymbol{\rho}}_g / \sum_i \hat{\rho}_{ig} \right). \quad (3)$$

390 The cleaned reads  $R$  are then treated as correct in subsequent inference steps. This can be seen as an  
 391 empirical Bayes approach, where the model in Equation (2) is optimized and uncertainty over  $R$  is replaced  
 392 with a point estimate that maximizes the marginal likelihood of possible true read configurations.

### 393 Discrete deconvolution model

394 The spot-wise gene counts  $R_{ig}$  can be decomposed into the sum of cell type-specific gene reads in any given  
 395 spot, i.e.  $R_{ig} = \sum_{k=1}^K R_{igk}$ . BayesTME models the cell type-specific reads with a Poisson distribution  
 396 controlled by three parameters  $\beta_k$ ,  $d_{ik}$  and  $\phi_{kg}$ . Specifically,  $\beta_k$  denotes the expected total UMI count of  
 397 individual cells of type  $k$ ;  $d_{ik}$  denotes the number of cells of type  $k$  located in spot  $i$ ; and  $\boldsymbol{\phi}_k = (\phi_{k1}, \dots, \phi_{kG})$   
 398 denotes the gene expression profile of cell type  $k$ , where each element  $\phi_{kg}$  is the normalized expression of  
 399 gene  $g$  in cell type  $k$ ; equivalently,  $\phi_{kg}$  is the proportion of UMIs that cell type  $k$  allocates to gene  $g$ . The

<sup>2</sup>Technically these basis functions are pseudo-distances as they do not satisfy symmetry and thus are not metric functions.



400 generative model for BayesTME follows,

$$\begin{aligned}
 R_{ig} &= \sum_{k=1}^K R_{igk} \\
 R_{igk} &\sim \text{Pois}(\beta_k d_{ik} \phi_{kg}) \\
 \boldsymbol{\phi}_k &\sim \text{Dir}(\boldsymbol{\alpha}) \\
 \beta_k &\sim \text{Gamma}(a, b) \\
 D_i &\sim \text{Binom}(n_{\max}, 1 - \sigma(\psi_{i0})) \\
 d_{ik} &\sim \text{Binom}(n_{k-1}, \sigma(\psi_{ik})), \quad \forall 1 < k < K \\
 (\Delta\Psi)_j &\sim \text{GroupHorseshoe}(\lambda)
 \end{aligned} \tag{4}$$

401 where  $D_i$  is the total number of cells in spot  $i$ , and  $\lambda$  is the hyperparameter that controls the degree of  
 402 spatial smoothing. The matrix  $\Delta$  is the edge-oriented adjacency matrix encoding the spot graph  $\mathcal{G}$ , also  
 403 equivalent to the square root of the graph Laplacian. The hierarchical prior encoded by the last three lines  
 404 of Equation (4) is a heavy-tailed Bayesian variant of the graph-fused group lasso prior<sup>27,26</sup> that uses the  
 405 Horseshoe+ distribution<sup>25</sup>. This prior encourages the probability distribution over cell type proportions to  
 406 follow a piecewise constant spatial function, encoding the prior belief that cells form spatially contiguous  
 407 communities. The model is data-adaptive, however, and able to handle deviations from this prior where  
 408 warranted in the data; see for example, the smooth gradient of cell type proportions recovered in Figure 7.

## 409 Posterior inference

410 Posterior inference in BayesTME is performed through Gibbs sampling. The full derivations for all complete  
 411 conditionals and update steps are available in the supplementary material. The key computational innovations  
 412 in BayesTME come in the form of a fast approach to update  $d_{ik}$ , the number of cells of type  $k$  in spot  $i$ . As we  
 413 show in the supplement, block joint sampling over all  $\mathbf{d}_i$  and  $D_i$  can be done via an efficient forward-backward  
 414 algorithm. This algorithm effectively converts the cell count prior to a hidden Markov model prior. The  
 415 Poisson likelihood in Equation (4) acts as the emissions step and the emission log-likelihood can be collapsed  
 416 into a series of fast updates. This inference step enables us to sample over the entire combinatorial space of  
 417 possible cell counts in  $\mathcal{O}(ND_{\max}^2 K^2)$  time for  $N$  spots,  $K$  cell types, and  $0 \leq D_i \leq D_{\max}$  possible total cells  
 418 in each spot. BayesTME performs Gibbs sampling using these fast updates with a burn-in and Markov chain  
 419 thinning; we use 2000 burn-in steps, 5 thinning steps between each sample, and gather a total of  $T = 100$   
 420 post-burn-in posterior samples.

## 421 Selecting the number of cell types and smoothness hyperparameters

422 BayesTME automatically chooses the number of cell types  $K$  via  $M$ -fold cross-validation. For each fold, a  
 423 random non-overlapping subset of the spots are held out; we use  $M = 5$  folds with 5% of spots held out  
 424 in each fold. The spatial priors in BayesTME enable imputation of the cell type probabilities at each held  
 425 out spot in the training data. For each fold, we fit over a discrete grid of  $\lambda$  smoothness values; we use  
 426  $\lambda = (10^0, 10^1, \dots, 10^6)$ . For a given fold  $m$ , cell type count  $K$ , and smoothness level  $\lambda$ , we calculate the  
 427 approximate marginal log-likelihood of the held out spots using  $T$  posterior samples,

$$\mathcal{L}^{\text{test}} = \sum_{i \in \text{fold}_m} \sum_{t=1}^T \log \text{Mult} \left( \mathbf{R}_i; \sum_g R_{ig}, \frac{\sum_k \beta_k^{(t)} \theta_{ik}^{(t)} \phi_k^{(t)}}{\sum_g \sum_k \beta_k^{(t)} \theta_{ik}^{(t)} \phi_{kg}^{(t)}} \right). \tag{5}$$

428 Results are averaged over all  $\lambda$  values for each fold and then averaged across each fold. The  $\lambda$  averaging is  
 429 an empirical Bayes estimate with a discrete prior on  $\lambda$  integrated out; the cross-validation averaging is an  
 430 unbiased approach to selecting  $K$ . After selecting  $K$ , we refit BayesTME on the entire data using the chosen  
 431  $K$  and the  $\lambda$  with average cross-validation log-likelihood closest to the overall average.

## 432 Selecting marker genes

433 We define a gene as a marker of a particular cell type if its expression in that cell type is significantly higher  
 434 than in any other cell type. BayesTME uses posterior uncertainty to select statistically significant marker  
 435 genes with control of the Bayesian false discovery rate (FDR)<sup>42</sup>. To calculate the local FDR we use the  $T$   
 436 posterior samples,

$$\omega_{kg} = 1/T \sum_{t=1}^T \prod_{k' \neq k} \mathbb{1} \left[ \phi_{kg}^{(t)} > \phi_{k'g}^{(t)} \right], \quad (6)$$

437 yielding the posterior probability that gene  $g$  is a marker for cell type  $k$ . We sort the  $\omega$  values in descending  
 438 order and solve a step-down optimization problem,

$$\begin{aligned} & \underset{q}{\text{maximize}} && q \\ & \text{subject to} && \frac{\sum_{i=1}^q (1 - \omega_{(i)})}{q} \leq \alpha. \end{aligned} \quad (7)$$

439 The set of  $\omega$  values selected controls the Bayesian FDR at the  $\alpha$  level. BayesTME can alternatively control  
 440 the Bayesian Type I error rate at the  $\alpha$  level by only selecting marker genes satisfying  $\omega_{kg} \geq 1 - \alpha$ . We then  
 441 rank the selected marker gene candidates by  $\omega$  and  $\xi$  jointly, where

$$\xi_{kg} = \frac{\bar{\phi}_{kg} - \max\{\bar{\phi}_{k'g}\}_{k' \neq k}}{\max\{\bar{\phi}_{k'g}\}_{k'=1}^K}, \quad (8)$$

442 is the normalized expression score in  $[-1, 1]$  measuring the expression level of gene  $g$  in cell type  $k$  compared  
 443 with all the other cell types, and  $\bar{\phi}_{kg}$  is the posterior mean of  $T$  posterior samples. By default, we set the  
 444 FDR threshold to 5%; our results report an interpretable subset of the top 20 genes for each inferred cell type.

## 445 Community detection

446 To segment the tissue into cellular communities, BayesTME clusters the fused spatial probabilities  $\Psi$ . First,  
 447 the neighbor graph is augmented with the nearest 10 neighbors to adjust for spatially-disconnected spots  
 448 due to tissue tears in sectioning. The posterior samples are flattened into a single vector for each spot.  
 449 Spots are then clustered using agglomerative clustering with Ward linkage, as implemented in `scikit-learn`.  
 450 The number of clusters  $q$  is chosen over a grid of  $q \in (1, \dots, 50)$  to minimize the sum of the AIC<sup>43</sup> and  
 451 BIC<sup>44</sup> scores. Community distributions are calculated as the average of all posterior probabilities of all  
 452 spots assigned to the community. When comparing community segmentation in benchmarks, we applied  
 453 BayesTME's clustering algorithm on DestVI and stDeconvolve, as they do not provide segmentation routines.

## 454 Spatial transcriptional program model

455 The deconvolution model in Equation (4) assumes gene expression is stationary within a given cell type.  
 456 However, we expect that variation in a small number of important genes should be spatially dependent.  
 457 BayesTME captures this spatial variation by replacing the Poisson likelihood in Equation (4) with a more  
 458 complex negative binomial one,

$$\begin{aligned} R_{igk} &\sim \text{NegBinom}(\beta_k d_{ik} \phi_{kg}, \sigma(w_{ki}^{(h_{kg})} v_{kg} + c_{kg})) \\ h_{kg} &\sim \text{Cat}(\theta_k) \\ \theta_k &\sim \text{Dirichlet}(10, 1, 1, \dots, 1) \\ c_{kg} &\sim \mathcal{N}(0, 1) \\ v_{kg} &\sim \text{Horseshoe+} \\ w_k^{(0)} &= \mathbf{0} \\ (\Delta^{(1)} w_k^{(h>0)})_j &\sim \text{Horseshoe+}, \end{aligned} \quad (9)$$

459 where  $\sigma$  is the logistic function and  $\Delta^{(1)} = \Delta^T \Delta$  is the first-order graph trend filtering matrix, equivalent to  
 460 the graph Laplacian. The rate in Equation (9) is equivalent to that in the simpler model in Equation (4). In  
 461 both cases, the expected read count scales additively with the number of cells, a crucial property that reflects  
 462 the intuition that a spot with twice as many cells should yield twice as many reads.

463 Gene expression within a cell type varies spatially through the success probability (the second term) in the  
 464 negative binomial likelihood. The offset term  $c_{kg}$  corresponds to the spatially-invariant expression term that  
 465 controls the dispersion rate in the counts. Each gene  $g$  in each cell type  $k$  belongs to one of  $H$  clusters. Each  
 466 cluster defines a different spatial pattern  $\mathbf{w}_k^{(h)}$ , which we refer to as *spatial transcriptional programs*. The first  
 467 program  $\mathbf{w}_k^{(0)}$  is the null program corresponding to spatially-invariant expression. All subsequent programs  
 468 are latent and inferred through posterior inference. BayesTME places a heavy prior on genes coming from  
 469 the null, such that it takes substantial evidence to conclude that a gene is spatially varying within a cell  
 470 type; this prior is necessary as otherwise the model is only weakly identifiable. Genes that participate in  
 471 the non-null spatial programs do so by placing a weight  $v_{kg}$  on the spatial pattern. This weight shrinks,  
 472 magnifies, or can even invert the pattern, allowing for clustering of negatively correlated genes into the same  
 473 spatial transcriptional program. BayesTME places a sparsity-inducing prior on  $v_{kg}$  in order to encourage  
 474 only strongly-participating genes to be assigned to non-null programs.

## 475 Spatial transcriptional program inference

476 Posterior inference via Gibbs sampling is possible with the STP BayesTME model. However, the fast HMM  
 477 updates for the cell counts are no longer available, making the inference algorithm substantially slower.  
 478 For computational efficiency, we instead take a two-stage approach. First, we fit the deconvolution model  
 479 in Equation (4), collecting  $T$  posterior samples of each latent variable. Then we fix  $(\beta, \mathbf{d}, \Phi)^{(t)}$  for each  
 480 sample  $t = 1, \dots, T$ . For each fixed sample, we run a new Gibbs sampler for the non-fixed variables in  
 481 Equation (9); we use 99 burn-in iterations and take the 100<sup>th</sup> iteration as the sample for the  $t^{\text{th}}$  iteration of  
 482 the full model parameters. We motivate this approach mathematically by the identity that if  $Y \sim \text{Pois}(r)$   
 483 and  $X \sim \text{NegBinom}(r, p)$  then  $\mathbb{E}[Y] = \mathbb{E}[X \mid p = 0.5]$ . Since we put sparsity priors on  $v_{kg}$  and a standard  
 484 normal prior on  $c_{kg}$ , all of our priors are peaked at  $p = 0.5$ . Thus, *a priori*, we expect the posterior mean  
 485 under the full joint inference model to be nearly the same as the two-stage model; in practice, we find the  
 486 two approaches produce similar results.

## 487 Selecting significant spatial transcriptional programs

488 Spatial transcription programs in BayesTME correspond to spatial patterns in  $w_k^{(h)}$  in cell type  $k$  and the  
 489 members of a spatial program are the genes  $g$  for which  $h_{kg}$  is significantly non-null. Spatial programs are  
 490 only considered active in spots  $i$  where  $d_{ik} > 0$  with high probability. Specifically, for a given  $\alpha$  significance  
 491 level, we select spots and genes for spatial program  $s$  in cell type  $k$  as follows,

$$\begin{aligned}
 \mathcal{S}_{sk}^{\text{genes}}(\alpha) &= \left\{ v_{kg} : \left( 1/T \sum_{t=1}^T \mathbb{1}[h_{kg}^{(t)} = s] \right) \geq 1 - \alpha \right\} \\
 \mathcal{S}_{sk}^{\text{spots}}(\alpha) &= \left\{ w_{ki}^{(s)} : \left( 1/T \sum_{t=1}^T \mathbb{1}[d_{ik}^{(t)} > 0] \right) \geq 1 - \alpha \right\}.
 \end{aligned}
 \tag{10}$$

492 If either  $\mathcal{S}_{sk}^{\text{genes}}(\alpha)$  or  $\mathcal{S}_{sk}^{\text{spots}}(\alpha)$  is empty, we filter out the entire program. We also filter any programs where  
 493 the Pearson correlation between  $w_k^{(h)}$  and  $d_k$  is more than 0.5 and Moran's  $I$  spatial autocorrelation less  
 494 than 0.9; these programs capture technical noise and overdispersion rather than meaningful spatial signal. In  
 495 practice, we find  $H = 10$  to be a sufficient number of potential spatial programs per cell type. BayesTME  
 496 sets the spatial transcriptional program significant threshold to  $\alpha = 0.95$ .

## References

- 497
- 498 [1] Anusha Kalbasi and Antoni Ribas. Tumour-intrinsic resistance to immune checkpoint blockade. *Nature Reviews*  
499 *Immunology*, 20(1):25–39, 2020.
- 500 [2] Roy S Herbst, Jean-Charles Soria, Marcin Kowanz, Gregg D Fine, Omid Hamid, Michael S Gordon, Jeffery A  
501 Sosman, David F McDermott, John D Powderly, and Scott N Gettinger. Predictive correlates of response to the  
502 anti-PD-L1 antibody MPDL3280A in cancer patients. *Nature*, 515(7528):563–567, 2014.
- 503 [3] Thomas F Gajewski, Seng-Ryong Woo, Yuanyuan Zha, Robbert Spaapen, Yan Zheng, Leticia Corrales, and Stefani  
504 Spranger. Cancer immunotherapy strategies based on overcoming barriers within the tumor microenvironment.  
505 *Current Opinion in Immunology*, 25(2):268–276, 2013.
- 506 [4] Stefani Spranger, Robbert M Spaapen, Yuanyuan Zha, Jason Williams, Yuru Meng, Thanh T Ha, and Thomas F  
507 Gajewski. Up-regulation of PD-L1, IDO, and Tregs in the melanoma tumor microenvironment is driven by CD8+  
508 T cells. *Science Translational Medicine*, 5(200):200ra116–200ra116, 2013.
- 509 [5] Alessia Echarti, Markus Hecht, Maike Büttner-Herold, Marlen Haderlein, Arndt Hartmann, Rainer Fietkau, and  
510 Luitpold Distel. CD8+ and regulatory T cells differentiate tumor immune phenotypes and predict survival in  
511 locally advanced head and neck cancer. *Cancers*, 11(9):1398, 2019.
- 512 [6] Nicholas Navin, Jude Kendall, Jennifer Troge, Peter Andrews, Linda Rodgers, Jeanne McIndoo, Kerry Cook,  
513 Asya Stepansky, Dan Levy, and Diane Esposito. Tumour evolution inferred by single-cell sequencing. *Nature*, 472  
514 (7341):90–94, 2011.
- 515 [7] 10x Genomics. 10x Genomics: Visium spatial gene expression, 2022. URL [https://www.10xgenomics.com/  
516 products/spatial-gene-expression](https://www.10xgenomics.com/products/spatial-gene-expression).
- 517 [8] Sanja Vickovic, Gökçen Eraslan, Fredrik Salmén, Johanna Klughammer, Linnea Stenbeck, Denis Schapiro, Tarmo  
518 Äijö, Richard Bonneau, Ludvig Bergenstråhle, José Fernández Navarro, Joshua Gould, Gabriel K. Griffin, Åke  
519 Borg, Mostafa Ronaghi, Jonas Frisén, Joakim Lundeberg, Aviv Regev, and Patrik L. Ståhl. High-definition  
520 spatial transcriptomics for in situ tissue profiling. *Nature Methods*, 16(10):987–990, 2019.
- 521 [9] Samuel G Rodriques, Robert R Stickels, Aleksandrina Goeva, Carly A Martin, Evan Murray, Charles R Vanderburg,  
522 Joshua Welch, Linlin M Chen, Fei Chen, and Evan Z Macosko. Slide-seq: A scalable technology for measuring  
523 genome-wide expression at high spatial resolution. *Science*, 363(6434):1463–1467, 2019.
- 524 [10] Zijian Ni, Aman Prasad, Shuyang Chen, Richard B. Halberg, Lisa Arkin, Beth Drolet, Michael Newton, and  
525 Christina Kendzierski. SpotClean adjusts for spot swapping in spatial transcriptomics data. *bioRxiv*, 2021. doi:  
526 10.1101/2021.06.11.448105. URL <https://www.biorxiv.org/content/early/2021/07/28/2021.06.11.448105>.
- 527 [11] Edward Zhao, Matthew R Stone, Xing Ren, Jamie Guenthoer, Kimberly S Smythe, Thomas Pulliam, Stephen R  
528 Williams, Cedric R Uyttingco, Sarah EB Taylor, Paul Nghiem, Jason H Bielas, and Raphael Gottardo. Spatial  
529 transcriptomics at subspot resolution with bayesspace. *Nature Biotechnology*, pages 1–10, 2021.
- 530 [12] Duy Pham, Xiao Tan, Jun Xu, Laura F. Grice, Pui Yeng Lam, Arti Raghobar, Jana Vukovic, Marc J. Ruitenberg,  
531 and Quan Nguyen. stlearn: integrating spatial location, tissue morphology and gene expression to find cell types,  
532 cell-cell interactions and spatial trajectories within undissociated tissues. *bioRxiv*, 2020. doi: 10.1101/2020.05.31.  
533 125658. URL <https://www.biorxiv.org/content/early/2020/05/31/2020.05.31.125658>.
- 534 [13] Ruben Dries, Qian Zhu, Rui Dong, Chee-Huat Linus Eng, Huipeng Li, Kan Liu, Yuntian Fu, Tianxiao Zhao,  
535 Arpan Sarkar, Feng Bao, Rani E. George, Nico Pierson, Long Cai, and Guo-Cheng Yuan. Giotto: a toolbox for  
536 integrative analysis and visualization of spatial expression data. *Genome biology*, 22(1):1–31, 2021.
- 537 [14] Brendan F Miller, Feiyang Huang, Lyla Atta, Arpan Sahoo, and Jean Fan. Reference-free cell type deconvolution  
538 of multi-cellular pixel-resolution spatially resolved transcriptomics data. *Nature Communications*, 13(1):1–13,  
539 2022.
- 540 [15] Romain Lopez, Baoguo Li, Hadas Keren-Shaul, Pierre Boyeau, Merav Kedmi, David Pilzer, Adam Jelinski, Eyal  
541 David, Allon Wagner, Yoseph Addadi, Michael I Jordan, Ido Amit, and Nir Yosef. DestVI identifies continuums  
542 of cell types in spatial transcriptomics data. *Nature Biotechnology*, pages 1–10, 2022.

- 543 [16] Vitalii Kleshchevnikov, Artem Shmatko, Emma Dann, Alexander Aivazidis, Hamish W. King, Tong Li, Rasa  
544 Elmentaite, Artem Lomakin, Veronika Kedlian, Adam Gayoso, Mika Sarkin Jain, Jun Sung Park, Lauma Ramona,  
545 Elizabeth Tuck, Anna Arutyunyan, Roser Vento-Tormo, Moritz Gerstung, Louisa James, Oliver Stegle, and  
546 Omer Ali Bayraktar. Cell2location maps fine-grained cell types in spatial transcriptomics. *Nature Biotechnology*,  
547 pages 1–11, 2022.
- 548 [17] Shiquan Sun, Jiaqiang Zhu, and Xiang Zhou. Statistical analysis of spatial expression patterns for spatially  
549 resolved transcriptomic studies. *Nature Methods*, 17(2):193–200, 2020.
- 550 [18] Valentine Svensson, Sarah A Teichmann, and Oliver Stegle. SpatialDE: identification of spatially variable genes.  
551 *Nature Methods*, 15(5):343–346, 2018.
- 552 [19] Daniela F Quail and Johanna A Joyce. Microenvironmental regulation of tumor progression and metastasis.  
553 *Nature Medicine*, 19(11):1423–1437, 2013.
- 554 [20] Isabella S. Kim, Silja Heilmann, Emily R. Kansler, Yan Zhang, Milena Zimmer, Kajan Ratnakumar, Robert L.  
555 Bowman, Theresa Simon-Vermot, Myles Fennell, Ralph Garippa, Liang Lu, William Lee, Travis Hollmann, Joao B.  
556 Xavier, and Richard M. White. Microenvironment-derived factors driving metastatic plasticity in melanoma.  
557 *Nature Communications*, 8(1):14343, 2017.
- 558 [21] Hendrik Ungefroren, Susanne Sebens, Daniel Seidl, Hendrik Lehnert, and Ralf Hass. Interaction of tumor cells  
559 with the microenvironment. *Cell communication and signaling : CCS*, 9:18–18, 2011.
- 560 [22] Sergei I Grivennikov, Florian R Greten, and Michael Karin. Immunity, inflammation, and cancer. *Cell*, 140(6):  
561 883–899, 2010.
- 562 [23] Miranda V Hunter, Reuben Moncada, Joshua M Weiss, Itai Yanai, and Richard M White. Spatially resolved  
563 transcriptomics reveals the architecture of the tumor-microenvironment interface. *Nature communications*, 12(1):  
564 1–16, 2021.
- 565 [24] Carlos M. Carvalho, Nicholas G. Polson, and James G. Scott. The horseshoe estimator for sparse signals.  
566 *Biometrika*, 97(2):465–480, 2010.
- 567 [25] Anindya Bhadra, Jyotishka Datta, Nicholas G. Polson, and Brandon Willard. The horseshoe+ estimator of  
568 ultra-sparse signals. *Bayesian Analysis*, 12(4):1105–1131, 2017.
- 569 [26] Wesley Tansey, Alex Athey, Alex Reinhart, and James G. Scott. Multiscale spatial density smoothing: An  
570 application to large-scale radiological survey and anomaly detection. *Journal of the American Statistical*  
571 *Association*, 112(519):1047–1063, 2017.
- 572 [27] James R. Faulkner and Vladimir N. Minin. Locally adaptive smoothing with Markov random fields and shrinkage  
573 priors. *Bayesian Analysis*, 13(1):225, 2018.
- 574 [28] Kristen R. Maynard, Leonardo Collado-Torres, Lukas M. Weber, Cedric Uyttingco, Brianna K. Barry, Stephen R.  
575 Williams, Joseph L. Catallini, Matthew N. Tran, Zachary Besich, Madhavi Tippani, Jennifer Chew, Yifeng Yin,  
576 Joel E. Kleinman, Thomas M. Hyde, Nikhil Rao, Stephanie C. Hicks, Keri Martinowich, and Andrew E. Jaffe.  
577 Transcriptome-scale spatial gene expression in the human dorsolateral prefrontal cortex. *Nature Neuroscience*, 24  
578 (3):425–436, 2021.
- 579 [29] Ying Ma and Xiang Zhou. Spatially informed cell-type deconvolution for spatial transcriptomics. *Nature*  
580 *Biotechnology*, pages 1–11, 2022.
- 581 [30] Dylan M Cable, Evan Murray, Luli S Zou, Aleksandrina Goeva, Evan Z Macosko, Fei Chen, and Rafael A Irizarry.  
582 Robust decomposition of cell type mixtures in spatial transcriptomics. *Nature Biotechnology*, 40(4):517–526, 2022.
- 583 [31] Kim Thrane, Hanna Eriksson, Jonas Maaskola, Johan Hansson, and Joakim Lundeberg. Spatially resolved  
584 transcriptomics enables dissection of genetic heterogeneity in stage iii cutaneous malignant melanoma. *Cancer*  
585 *Research*, 78(20):5970–5979, 2018.
- 586 [32] David M Blei, Andrew Y Ng, and Michael I Jordan. Latent Dirichlet allocation. *Journal of Machine Learning*  
587 *Research*, 3(Jan):993–1022, 2003.

- 588 [33] Lawrence Hubert and Phipps Arabie. Comparing partitions. *Journal of Classification*, 2(1):193–218, 1985.
- 589 [34] Patrik L. Ståhl, Fredrik Salmén, Sanja Vickovic, Anna Lundmark, José Fernández Navarro, Jens Magnusson,  
590 Stefania Giacomello, Michaela Asp, Jakub O. Westholm, Mikael Huss, Annelie Mollbrink, Sten Linnarsson,  
591 Simone Codeluppi, Åke Borg, Fredrik Pontén, Paul Igor Costea, Pelin Sahlén, Jan Mulder, Olaf Bergmann,  
592 Joakim Lundeberg, and Jonas Frisén. Visualization and analysis of gene expression in tissue sections by spatial  
593 transcriptomics. *Science*, 353(6294):78–82, 2016. doi: 10.1126/science.aaf2403.
- 594 [35] Sidharth V. Puram, Itay Tirosh, Anuraag S. Parikh, Anoop P. Patel, Keren Yizhak, Shawn Gillespie, Christopher  
595 Rodman, Christina L. Luo, Edmund A. Mroz, Kevin S. Emerick, Daniel G. Deschler, Mark A. Varvares, Ravi  
596 Mylvaganam, Orit Rozenblatt-Rosen, James W. Rocco, William C. Faquin, Derrick T. Lin, Aviv Regev, and  
597 Bradley E. Bernstein. Single-cell transcriptomic analysis of primary and metastatic tumor ecosystems in head and  
598 neck cancer. *Cell*, 171(7):1611–1624.e24, 2017. ISSN 0092-8674. doi: <https://doi.org/10.1016/j.cell.2017.10.044>.
- 599 [36] Paola Marie Marcovecchio, Graham Thomas, and Shahram Salek-Ardakani. Cxcl9-expressing tumor-associated  
600 macrophages: new players in the fight against cancer. *Journal for Immunotherapy of Cancer*, 9(2), 2021.
- 601 [37] Melvyn T Chow, Aleksandra J Ozga, Rachel L Servis, Dennie T Frederick, Jennifer A Lo, David E Fisher,  
602 Gordon J Freeman, Genevieve M Boland, and Andrew D Luster. Intratumoral activity of the cxcr3 chemokine  
603 system is required for the efficacy of anti-pd-1 therapy. *Immunity*, 50(6):1498–1512, 2019.
- 604 [38] Anna Passarelli, Francesco Mannavola, Luigia Stefania Stucci, Marco Tucci, and Francesco Silvestris. Immune  
605 system and melanoma biology: a balance between immunosurveillance and immune escape. *Oncotarget*, 8(62):  
606 106132, 2017.
- 607 [39] R Huber, B Meier, A Otsuka, G Fenini, T Satoh, S Gehrke, D Widmer, MP Levesque, J Mangana, K Kerl,  
608 C Gebhardt, H Fujii, C Nakashima, Y Nonomura, K Kabashima, R Dummer, E Contassot, and French LE. Tumour  
609 hypoxia promotes melanoma growth and metastasis via high mobility group box-1 and m2-like macrophages.  
610 *Scientific Reports*, 6(1):1–14, 2016.
- 611 [40] Ryan J. Tibshirani. Adaptive piecewise polynomial estimation via trend filtering. *The Annals of Statistics*, 42(1):  
612 285–323, 2014.
- 613 [41] Yu-Xiang Wang, James Sharpnack, Alex Smola, and Ryan Tibshirani. Trend filtering on graphs. In *Artificial*  
614 *Intelligence and Statistics*, pages 1042–1050. PMLR, 2015.
- 615 [42] Bradley Efron. *Large-scale inference: Empirical Bayes methods for estimation, testing, and prediction*, volume 1.  
616 2012.
- 617 [43] Yosiyuki Sakamoto, Makio Ishiguro, and Genshiro Kitagawa. Akaike information criterion statistics. *Dordrecht,*  
618 *The Netherlands: D. Reidel*, 81(10.5555):26853, 1986.
- 619 [44] Andrew A Neath and Joseph E Cavanaugh. The bayesian information criterion: background, derivation, and  
620 applications. *Wiley Interdisciplinary Reviews: Computational Statistics*, 4(2):199–203, 2012.
